# Supplementary material for: Taming of tetranitroethane: a promising precursor for high performance energetic ingredients
Source: Royal Society of Chemistry journal article supplement (doi:10.1039/c8ta05394d), 2018-01-01
Supplement: c8ta05394d1.pdf [file c8ta05394d1.pdf]

# Electronic Supporting Information

## **Taming of Tetranitroethane: A Promising Precursor to High Performance Energetic Ingredients**

Ping Yin, Qiong Yu, Srinivas Dharavath, and Jean'ne M. Shreeve

### **Table of Contents**

|                                    |     |
|------------------------------------|-----|
| Crystallographic data of <b>10</b> | S2  |
| Crystallographic data of <b>11</b> | S5  |
| Crystallographic data of <b>12</b> | S9  |
| Crystallographic data of <b>14</b> | S12 |

**Table 1 Crystal data and structure refinement for 10.**

|                              |                                                                              |
|------------------------------|------------------------------------------------------------------------------|
| Formula                      | C <sub>2</sub> H <sub>12</sub> Ag <sub>2</sub> N <sub>8</sub> O <sub>8</sub> |
| CCDC #                       | 1847183                                                                      |
| $D_{calc.}/g\text{ cm}^{-3}$ | 2.705                                                                        |
| $\mu/\text{mm}^{-1}$         | 3.301                                                                        |
| Formula Weight               | 491.94                                                                       |
| Color                        | yellow                                                                       |
| Shape                        | needle                                                                       |
| Size/mm <sup>3</sup>         | 0.28×0.19×0.09                                                               |
| $T/\text{K}$                 | 173(2)                                                                       |
| Crystal System               | tetragonal                                                                   |
| Space Group                  | I4/m                                                                         |
| $a/\text{Å}$                 | 11.6936(9)                                                                   |
| $b/\text{Å}$                 | 11.6936(9)                                                                   |
| $c/\text{Å}$                 | 8.8330(8)                                                                    |
| $\alpha/^\circ$              | 90                                                                           |
| $\beta/^\circ$               | 90                                                                           |
| $\gamma/^\circ$              | 90                                                                           |
| $V/\text{Å}^3$               | 1207.8(2)                                                                    |
| $Z$                          | 4                                                                            |
| $Z'$                         | 0.25                                                                         |
| Wavelength/Å                 | 0.710730                                                                     |
| Radiation type               | MoK $\alpha$                                                                 |
| $\theta_{min}/^\circ$        | 2.463                                                                        |
| $\theta_{max}/^\circ$        | 25.180                                                                       |
| Measured Refl.               | 9946                                                                         |
| Independent Refl.            | 586                                                                          |
| Reflections Used             | 584                                                                          |
| $R_{int}$                    | 0.0249                                                                       |
| Parameters                   | 71                                                                           |
| Restraints                   | 0                                                                            |
| Largest Peak                 | 1.422                                                                        |
| Deepest Hole                 | -2.225                                                                       |
| Goof                         | 1.196                                                                        |
| $wR_2$ (all data)            | 0.2378                                                                       |
| $wR_2$                       | 0.2378                                                                       |
| $R_1$ (all data)             | 0.0663                                                                       |
| $R_1$                        | 0.0663                                                                       |

**Table 2. Fractional Atomic Coordinates ( $\times 10^4$ ) and Equivalent Isotropic Displacement Parameters ( $\text{Å}^2 \times 10^3$ ) for 10.  $U_{eq}$  is defined as 1/3 of the trace of the orthogonalised  $U_{ij}$ .**

| Atom | x        | y        | z          | $U_{eq}$ |
|------|----------|----------|------------|----------|
| Ag1  | 5000     | 5000     | 6896.7(18) | 21.3(7)  |
| Ag2  | 5000(2)  | 3578(2)  | 10000      | 20.8(8)  |
| N3   | 6271(17) | 3723(17) | 6840(20)   | 21(2)    |
| N4   | 6617(15) | 3380(16) | 9100(20)   | 21(2)    |
| O1   | 6546(12) | 556(14)  | 6498(18)   | 21(3)    |
| O2   | 5920(14) | 2235(12) | 5856(19)   | 26(4)    |
| O3   | 3451(12) | 555(14)  | 3507(18)   | 22(3)    |
| O4   | 4079(14) | 2233(12) | 4143(19)   | 26(4)    |
| N1   | 5827(15) | 1193(17) | 5840(20)   | 21(2)    |
| N2   | 4173(15) | 1191(17) | 4170(20)   | 21(2)    |
| C1   | 4998(12) | 602(14)  | 5000       | 15(3)    |

**Table 3. Anisotropic Displacement Parameters ( $\times 10^4$ )** 10. The anisotropic displacement factor exponent takes the form:  $-2\pi^2[h^2a^{*2} \times U_{11} + \dots + 2hka^* \times b^* \times U_{12}]$ .

| Atom | $U_{11}$ | $U_{22}$ | $U_{33}$ | $U_{23}$ | $U_{13}$ | $U_{12}$ |
|------|----------|----------|----------|----------|----------|----------|
| Ag1  | 23.1(8)  | 23.1(8)  | 17.6(11) | 0        | 0        | 0        |
| Ag2  | 19.4(13) | 23.1(14) | 19.7(14) | 0        | 0        | 0.0(8)   |
| N3   | 21(5)    | 26(5)    | 16(4)    | -2(4)    | 2(4)     | -1(4)    |
| N4   | 21(5)    | 26(5)    | 16(4)    | -2(4)    | 2(4)     | -1(4)    |
| O1   | 13(7)    | 32(9)    | 18(7)    | 4(7)     | -9(6)    | 8(6)     |
| O2   | 38(9)    | 13(7)    | 28(9)    | -7(7)    | 12(8)    | -6(6)    |
| O3   | 13(7)    | 34(9)    | 18(7)    | -3(7)    | -9(6)    | -7(6)    |
| O4   | 38(9)    | 12(7)    | 28(9)    | 4(7)     | 14(8)    | 7(6)     |
| N1   | 21(5)    | 26(5)    | 16(4)    | -2(4)    | 2(4)     | -1(4)    |
| N2   | 21(5)    | 26(5)    | 16(4)    | -2(4)    | 2(4)     | -1(4)    |
| C1   | 10(6)    | 28(8)    | 7(6)     | 0        | 0        | -1(6)    |

**Table 4. Bond Lengths in Å for 10.**

| Atom | Atom             | Length/Å   | Atom | Atom            | Length/Å |
|------|------------------|------------|------|-----------------|----------|
| Ag1  | Ag1 <sup>1</sup> | 3.351(3)   | O1   | O3 <sup>8</sup> | 1.30(2)  |
| Ag1  | Ag2              | 3.2063(19) | O1   | N1              | 1.27(2)  |
| Ag1  | Ag2 <sup>2</sup> | 3.2064(19) | O2   | O2 <sup>9</sup> | 1.51(3)  |
| Ag1  | Ag2 <sup>3</sup> | 3.2064(19) | O2   | N1              | 1.22(3)  |
| Ag1  | Ag2 <sup>4</sup> | 3.2063(19) | O3   | O1 <sup>8</sup> | 1.30(2)  |
| Ag1  | N3 <sup>2</sup>  | 2.11(2)    | O3   | N2              | 1.27(2)  |
| Ag1  | N3 <sup>5</sup>  | 2.11(2)    | O4   | O4 <sup>9</sup> | 1.51(3)  |
| Ag1  | N3               | 2.11(2)    | O4   | N2              | 1.22(2)  |
| Ag1  | N3 <sup>6</sup>  | 2.11(2)    | N1   | N1 <sup>9</sup> | 1.48(4)  |
| Ag2  | Ag1 <sup>3</sup> | 3.2064(19) | N1   | C1              | 1.40(2)  |
| Ag2  | Ag2 <sup>4</sup> | 2.352(3)   | N2   | N2 <sup>9</sup> | 1.47(4)  |
| Ag2  | Ag2 <sup>2</sup> | 2.352(3)   | N2   | C1              | 1.40(2)  |
| Ag2  | Ag2 <sup>3</sup> | 3.327(5)   | C1   | N1 <sup>9</sup> | 1.40(2)  |
| Ag2  | N4 <sup>4</sup>  | 2.068(18)  | C1   | N2 <sup>9</sup> | 1.40(2)  |
| Ag2  | N4               | 2.065(18)  | C1   | C1 <sup>8</sup> | 1.41(3)  |
| Ag2  | N4 <sup>6</sup>  | 2.068(18)  |      |                 |          |
| Ag2  | N4 <sup>7</sup>  | 2.065(18)  |      |                 |          |
| N4   | Ag2 <sup>2</sup> | 2.068(18)  |      |                 |          |
| N4   | N4 <sup>7</sup>  | 1.60(4)    |      |                 |          |

-----  
<sup>1</sup>1-X,1-Y,1-Z; <sup>2</sup>1-Y,+X,+Z; <sup>3</sup>1-X,1-Y,2-Z; <sup>4</sup>+Y,1-X,2-Z; <sup>5</sup>1-X,1-Y,+Z; <sup>6</sup>+Y,1-X,+Z; <sup>7</sup>+X,+Y,2-Z; <sup>8</sup>1-X,-Y,1-Z; <sup>9</sup>+X,+Y,1-Z

**Table 5. Bond Angles in ° for 10.**

| Atom             | Atom | Atom             | Angle/°   | Atom             | Atom | Atom             | Angle/°   |
|------------------|------|------------------|-----------|------------------|------|------------------|-----------|
| Ag2 <sup>1</sup> | Ag1  | Ag1 <sup>2</sup> | 148.75(4) | N3               | Ag1  | Ag2 <sup>3</sup> | 112.7(5)  |
| Ag2 <sup>3</sup> | Ag1  | Ag1 <sup>2</sup> | 148.75(4) | N3 <sup>1</sup>  | Ag1  | Ag2 <sup>1</sup> | 69.7(5)   |
| Ag2              | Ag1  | Ag1 <sup>2</sup> | 148.75(4) | N3 <sup>1</sup>  | Ag1  | Ag2 <sup>4</sup> | 69.8(5)   |
| Ag2 <sup>4</sup> | Ag1  | Ag1 <sup>2</sup> | 148.75(4) | N3 <sup>6</sup>  | Ag1  | N3               | 177.3(10) |
| Ag2 <sup>1</sup> | Ag1  | Ag2 <sup>3</sup> | 62.50(8)  | N3 <sup>5</sup>  | Ag1  | N3               | 89.97(3)  |
| Ag2              | Ag1  | Ag2 <sup>3</sup> | 43.04(5)  | N3 <sup>1</sup>  | Ag1  | N3 <sup>6</sup>  | 89.97(3)  |
| Ag2 <sup>4</sup> | Ag1  | Ag2 <sup>3</sup> | 43.04(5)  | N3 <sup>1</sup>  | Ag1  | N3               | 89.97(3)  |
| Ag2              | Ag1  | Ag2 <sup>1</sup> | 43.04(5)  | N3 <sup>5</sup>  | Ag1  | N3 <sup>6</sup>  | 89.97(3)  |
| Ag2              | Ag1  | Ag2 <sup>4</sup> | 62.50(8)  | N3 <sup>5</sup>  | Ag1  | N3 <sup>1</sup>  | 177.3(10) |
| Ag2 <sup>1</sup> | Ag1  | Ag2 <sup>4</sup> | 43.04(5)  | Ag1              | Ag2  | Ag1 <sup>4</sup> | 117.50(8) |
| N3 <sup>5</sup>  | Ag1  | Ag1 <sup>2</sup> | 88.7(5)   | Ag1 <sup>4</sup> | Ag2  | Ag2 <sup>4</sup> | 58.75(4)  |
| N3 <sup>6</sup>  | Ag1  | Ag1 <sup>2</sup> | 88.7(5)   | Ag1              | Ag2  | Ag2 <sup>4</sup> | 58.75(4)  |
| N3 <sup>1</sup>  | Ag1  | Ag1 <sup>2</sup> | 88.7(5)   | Ag2 <sup>3</sup> | Ag2  | Ag1 <sup>4</sup> | 68.48(3)  |
| N3               | Ag1  | Ag1 <sup>2</sup> | 88.7(5)   | Ag2 <sup>1</sup> | Ag2  | Ag1              | 68.48(3)  |
| N3 <sup>1</sup>  | Ag1  | Ag2 <sup>3</sup> | 112.8(5)  | Ag2 <sup>1</sup> | Ag2  | Ag1 <sup>4</sup> | 68.48(3)  |
| N3 <sup>6</sup>  | Ag1  | Ag2 <sup>4</sup> | 69.7(5)   | Ag2 <sup>3</sup> | Ag2  | Ag1              | 68.48(3)  |
| N3 <sup>5</sup>  | Ag1  | Ag2 <sup>3</sup> | 69.7(5)   | Ag2 <sup>1</sup> | Ag2  | Ag2 <sup>4</sup> | 45.0      |
| N3 <sup>5</sup>  | Ag1  | Ag2              | 69.8(5)   | Ag2 <sup>3</sup> | Ag2  | Ag2 <sup>4</sup> | 45.0      |
| N3               | Ag1  | Ag2 <sup>4</sup> | 112.8(5)  | Ag2 <sup>1</sup> | Ag2  | Ag2 <sup>3</sup> | 90.0      |
| N3 <sup>6</sup>  | Ag1  | Ag2 <sup>3</sup> | 69.8(5)   | N4               | Ag2  | Ag1 <sup>4</sup> | 112.9(5)  |
| N3               | Ag1  | Ag2 <sup>1</sup> | 69.8(5)   | N4               | Ag2  | Ag1              | 74.2(5)   |
| N3 <sup>6</sup>  | Ag1  | Ag2              | 112.8(5)  | N4 <sup>5</sup>  | Ag2  | Ag1 <sup>4</sup> | 112.8(5)  |
| N3 <sup>5</sup>  | Ag1  | Ag2 <sup>4</sup> | 112.7(5)  | N4 <sup>3</sup>  | Ag2  | Ag1              | 112.8(5)  |
| N3 <sup>6</sup>  | Ag1  | Ag2 <sup>1</sup> | 112.7(5)  | N4 <sup>5</sup>  | Ag2  | Ag1              | 74.1(5)   |
| N3 <sup>1</sup>  | Ag1  | Ag2              | 112.7(5)  | N4 <sup>3</sup>  | Ag2  | Ag1 <sup>4</sup> | 74.1(5)   |
| N3 <sup>5</sup>  | Ag1  | Ag2 <sup>1</sup> | 112.8(5)  | N4 <sup>7</sup>  | Ag2  | Ag1 <sup>4</sup> | 74.2(5)   |
| N3               | Ag1  | Ag2              | 69.7(5)   | N4 <sup>7</sup>  | Ag2  | Ag1              | 112.9(5)  |

| Atom            | Atom | Atom             | Angle <sup>o</sup> |
|-----------------|------|------------------|--------------------|
| N4              | Ag2  | Ag2 <sup>1</sup> | 55.4(5)            |
| N4              | Ag2  | Ag2 <sup>3</sup> | 136.6(5)           |
| N4 <sup>3</sup> | Ag2  | Ag2 <sup>1</sup> | 136.5(5)           |
| N4 <sup>7</sup> | Ag2  | Ag2 <sup>4</sup> | 96.4(5)            |
| N4 <sup>3</sup> | Ag2  | Ag2 <sup>3</sup> | 55.3(5)            |
| N4 <sup>5</sup> | Ag2  | Ag2 <sup>3</sup> | 55.3(5)            |
| N4 <sup>5</sup> | Ag2  | Ag2 <sup>4</sup> | 96.3(5)            |
| N4 <sup>7</sup> | Ag2  | Ag2 <sup>1</sup> | 55.4(5)            |
| N4 <sup>7</sup> | Ag2  | Ag2 <sup>3</sup> | 136.6(5)           |
| N4 <sup>3</sup> | Ag2  | Ag2 <sup>4</sup> | 96.3(5)            |
| N4              | Ag2  | Ag2 <sup>4</sup> | 96.4(5)            |
| N4 <sup>5</sup> | Ag2  | Ag2 <sup>1</sup> | 136.5(5)           |
| N4 <sup>7</sup> | Ag2  | N4 <sup>3</sup>  | 132.6(9)           |
| N4              | Ag2  | N4 <sup>7</sup>  | 45.5(10)           |
| N4              | Ag2  | N4 <sup>3</sup>  | 167.3(6)           |
| N4 <sup>5</sup> | Ag2  | N4 <sup>3</sup>  | 45.4(10)           |
| N4              | Ag2  | N4 <sup>5</sup>  | 132.6(9)           |
| N4 <sup>7</sup> | Ag2  | N4 <sup>5</sup>  | 167.3(6)           |
| Ag2             | N4   | Ag2 <sup>1</sup> | 69.4(6)            |
| N4 <sup>7</sup> | N4   | Ag2 <sup>1</sup> | 67.3(5)            |
| N4 <sup>7</sup> | N4   | Ag2              | 67.3(5)            |
| N1              | O1   | O3 <sup>8</sup>  | 126.0(16)          |
| N1              | O2   | O2 <sup>9</sup>  | 89.3(12)           |
| N2              | O3   | O1 <sup>8</sup>  | 125.9(16)          |
| N2              | O4   | O4 <sup>9</sup>  | 89.1(12)           |

Table 6. Torsion Angles in <sup>o</sup> for 10.

| Atom            | Atom | Atom | Atom            | Angle <sup>o</sup> |
|-----------------|------|------|-----------------|--------------------|
| O1 <sup>1</sup> | O3   | N2   | O4              | -177.7(18)         |
| O1 <sup>1</sup> | O3   | N2   | N2 <sup>2</sup> | -68(2)             |
| O1 <sup>1</sup> | O3   | N2   | C1              | -3(3)              |
| O1              | N1   | C1   | N1 <sup>2</sup> | -108.2(15)         |
| O1              | N1   | C1   | N2 <sup>2</sup> | 125.3(17)          |
| O1              | N1   | C1   | N2              | -177.6(15)         |
| O1              | N1   | C1   | C1 <sup>1</sup> | 2(2)               |
| O2 <sup>2</sup> | O2   | N1   | O1              | 123.1(18)          |
| O2 <sup>2</sup> | O2   | N1   | N1 <sup>2</sup> | -0.001(3)          |
| O2 <sup>2</sup> | O2   | N1   | C1              | -51.0(16)          |
| O2              | N1   | C1   | N1 <sup>2</sup> | 66(2)              |
| O2              | N1   | C1   | N2 <sup>2</sup> | -60(2)             |
| O2              | N1   | C1   | N2              | -3(2)              |
| O2              | N1   | C1   | C1 <sup>1</sup> | 176.8(16)          |
| O3 <sup>1</sup> | O1   | N1   | O2              | -177.0(18)         |
| O3 <sup>1</sup> | O1   | N1   | N1 <sup>2</sup> | -68(2)             |
| O3 <sup>1</sup> | O1   | N1   | C1              | -2(3)              |
| O3              | N2   | C1   | N1 <sup>2</sup> | 125.3(17)          |
| O3              | N2   | C1   | N1              | -177.5(15)         |
| O3              | N2   | C1   | N2 <sup>2</sup> | -108.2(14)         |
| O3              | N2   | C1   | C1 <sup>1</sup> | 3(2)               |
| O4 <sup>2</sup> | O4   | N2   | O3              | 123.2(17)          |
| O4 <sup>2</sup> | O4   | N2   | N2 <sup>2</sup> | -0.001(4)          |
| O4 <sup>2</sup> | O4   | N2   | C1              | -51.1(16)          |
| O4              | N2   | C1   | N1 <sup>2</sup> | -60(2)             |
| O4              | N2   | C1   | N1              | -3(2)              |
| O4              | N2   | C1   | N2 <sup>2</sup> | 66(2)              |
| O4              | N2   | C1   | C1 <sup>1</sup> | 177.2(16)          |
| N1 <sup>2</sup> | N1   | C1   | N2 <sup>2</sup> | -126.5(12)         |
| N1 <sup>2</sup> | N1   | C1   | N2              | -69.4(12)          |
| N1 <sup>2</sup> | N1   | C1   | C1 <sup>1</sup> | 110.5(14)          |
| N2 <sup>2</sup> | N2   | C1   | N1              | -69.3(12)          |
| N2 <sup>2</sup> | N2   | C1   | N1 <sup>2</sup> | -126.6(12)         |
| N2 <sup>2</sup> | N2   | C1   | C1 <sup>1</sup> | 110.8(14)          |

-----  
<sup>1</sup>1-X,-Y,1-Z;

<sup>2</sup>+X,+Y,1-Z

Table 7. Hydrogen Fractional Atomic Coordinates ( $\times 10^4$ ) and Equivalent Isotropic Displacement Parameters ( $\text{\AA}^2 \times 10^3$ ) for 10.  $U_{eq}$  is defined as 1/3 of the trace of the orthogonalised  $U_{ij}$ .

| Atom            | Atom | Atom            | Angle <sup>o</sup> |
|-----------------|------|-----------------|--------------------|
| O1              | N1   | N1 <sup>9</sup> | 117.4(11)          |
| O1              | N1   | C1              | 114.4(18)          |
| O2              | N1   | O1              | 121.4(19)          |
| O2              | N1   | N1 <sup>9</sup> | 90.7(12)           |
| O2              | N1   | C1              | 124.0(18)          |
| C1              | N1   | N1 <sup>9</sup> | 58.1(8)            |
| O3              | N2   | N2 <sup>9</sup> | 117.4(11)          |
| O3              | N2   | C1              | 114.5(18)          |
| O4              | N2   | O3              | 121.1(19)          |
| O4              | N2   | N2 <sup>9</sup> | 90.9(12)           |
| O4              | N2   | C1              | 124.2(18)          |
| C1              | N2   | N2 <sup>9</sup> | 58.1(8)            |
| N1 <sup>9</sup> | C1   | N1              | 63.9(16)           |
| N1 <sup>9</sup> | C1   | C1 <sup>8</sup> | 119.4(15)          |
| N1              | C1   | C1 <sup>8</sup> | 119.4(15)          |
| N2              | C1   | N1 <sup>9</sup> | 87.4(12)           |
| N2              | C1   | N1              | 120.9(16)          |
| N2 <sup>9</sup> | C1   | N1 <sup>9</sup> | 120.9(16)          |
| N2 <sup>9</sup> | C1   | N1              | 87.4(12)           |
| N2              | C1   | N2 <sup>9</sup> | 63.7(16)           |
| N2 <sup>9</sup> | C1   | C1 <sup>8</sup> | 119.7(15)          |
| N2              | C1   | C1 <sup>8</sup> | 119.7(15)          |

-----  
<sup>1</sup>1-Y,+X,+Z; <sup>2</sup>1-X,1-Y,1-Z; <sup>3</sup>+Y,1-X,2-Z; <sup>4</sup>1-X,1-Y,2-Z; <sup>5</sup>+Y,1-X,+Z;  
<sup>6</sup>1-X,1-Y,+Z; <sup>7</sup>+X,+Y,2-Z; <sup>8</sup>1-X,-Y,1-Z; <sup>9</sup>+X,+Y,1-Z

| Atom | x    | y    | z    | $U_{eq}$ |
|------|------|------|------|----------|
| H3A  | 6415 | 3525 | 5863 | 25       |
| H3B  | 6025 | 3099 | 7361 | 25       |
| H3C  | 6923 | 3995 | 7273 | 25       |
| H4A  | 7133 | 3315 | 9862 | 25       |
| H4B  | 6794 | 3998 | 8516 | 25       |
| H4C  | 6636 | 2738 | 8516 | 25       |

**Table 8. Hydrogen Bond information for 10.**

| D  | H   | A               | d(D-H)/Å | d(H-A)/Å | d(D-A)/Å | D-H-A/deg |
|----|-----|-----------------|----------|----------|----------|-----------|
| N3 | H3A | O2 <sup>1</sup> | 0.91     | 2.22     | 2.98(3)  | 140.9     |
| N3 | H3A | O4 <sup>2</sup> | 0.91     | 2.29     | 2.98(3)  | 133.3     |
| N3 | H3B | O3 <sup>3</sup> | 0.91     | 2.15     | 3.05(2)  | 175.3     |
| N3 | H3C | O1 <sup>4</sup> | 0.91     | 2.16     | 3.06(2)  | 172.3     |

-----  
<sup>1</sup>+X,+Y,1-Z;

<sup>2</sup>1-Y,+X,+Z;

<sup>3</sup>1/2+Y,1/2-X,1/2+Z;

<sup>4</sup>3/2-X,1/2-Y,3/2-Z

**Table 9. Atomic Occupancies for all atoms that are not fully occupied in 10.**

| Atom | Occupancy |
|------|-----------|
| Ag2  | 0.5       |
| N3   | 0.5       |
| H3A  | 0.5       |
| H3B  | 0.5       |
| H3C  | 0.5       |
| N4   | 0.5       |
| H4A  | 0.5       |
| H4B  | 0.5       |
| H4C  | 0.5       |
| O1   | 0.5       |
| O2   | 0.5       |
| O3   | 0.5       |
| O4   | 0.5       |
| N1   | 0.5       |
| N2   | 0.5       |

**Table 10. Crystal data and structure refinement for 11.**

|                                             |                                                               |
|---------------------------------------------|---------------------------------------------------------------|
| Identification code                         | 11                                                            |
| CCDC #                                      | 1847186                                                       |
| Empirical formula                           | C <sub>2</sub> H <sub>8</sub> N <sub>6</sub> O <sub>8</sub>   |
| Formula weight                              | 244.14                                                        |
| Temperature/K                               | 130                                                           |
| Crystal system                              | monoclinic                                                    |
| Space group                                 | P2 <sub>1</sub> /n                                            |
| a/Å                                         | 9.2546(11)                                                    |
| b/Å                                         | 7.8000(9)                                                     |
| c/Å                                         | 13.1353(14)                                                   |
| α/°                                         | 90                                                            |
| β/°                                         | 107.923(3)                                                    |
| γ/°                                         | 90                                                            |
| Volume/Å <sup>3</sup>                       | 902.17(18)                                                    |
| Z                                           | 4                                                             |
| ρ <sub>calc</sub> /cm <sup>3</sup>          | 1.797                                                         |
| μ/mm <sup>-1</sup>                          | 0.180                                                         |
| F(000)                                      | 504.0                                                         |
| Crystal size/mm <sup>3</sup>                | 0.15 × 0.15 × 0.05                                            |
| Radiation                                   | MoKα (λ = 0.71073)                                            |
| 2θ range for data collection/°              | 6.158 to 61.08                                                |
| Index ranges                                | -13 ≤ h ≤ 13, -11 ≤ k ≤ 11, -18 ≤ l ≤ 18                      |
| Reflections collected                       | 20104                                                         |
| Independent reflections                     | 2763 [R <sub>int</sub> = 0.0391, R <sub>sigma</sub> = 0.0282] |
| Data/restraints/parameters                  | 2763/0/177                                                    |
| Goodness-of-fit on F <sup>2</sup>           | 1.067                                                         |
| Final R indexes [I ≥ 2σ (I)]                | R <sub>1</sub> = 0.0392, wR <sub>2</sub> = 0.0826             |
| Final R indexes [all data]                  | R <sub>1</sub> = 0.0589, wR <sub>2</sub> = 0.0897             |
| Largest diff. peak/hole / e Å <sup>-3</sup> | 0.37/-0.30                                                    |

**Table 11. Fractional Atomic Coordinates (×10<sup>4</sup>) and Equivalent Isotropic Displacement Parameters (Å<sup>2</sup>×10<sup>3</sup>) for 11. U<sub>eq</sub> is defined as 1/3 of of the trace of the orthogonalised U<sub>ij</sub> tensor.**

| Atom | x           | y          | z         | U(eq)     |
|------|-------------|------------|-----------|-----------|
| O1   | 6978.2(10)  | 220.4(11)  | 3517.6(7) | 16.5(2)   |
| O2   | 4713.7(10)  | 1113.8(13) | 3396.1(7) | 20.0(2)   |
| O3   | 4461.9(9)   | 2264.8(12) | 5183.5(6) | 16.6(2)   |
| O4   | 6552.1(10)  | 3188.6(11) | 6342.9(6) | 13.94(18) |
| O5   | 8403.6(10)  | 151.6(11)  | 6586.7(7) | 17.7(2)   |
| O6   | 10473.5(10) | 1583.6(12) | 6770.9(7) | 18.1(2)   |
| O7   | 10621.1(9)  | 2782.4(13) | 4953.2(7) | 19.2(2)   |
| O8   | 8441.1(10)  | 3493.7(11) | 3814.2(6) | 14.44(19) |
| N1   | 6084.8(11)  | 1031.9(13) | 3869.2(8) | 11.9(2)   |
| N2   | 5880.8(10)  | 2469.5(12) | 5442.3(7) | 10.17(19) |
| N3   | 9150.1(11)  | 1213.2(13) | 6254.2(8) | 11.4(2)   |
| N4   | 9196.1(10)  | 2803.7(13) | 4691.3(7) | 10.6(2)   |
| C1   | 6758.3(12)  | 1914.4(15) | 4856.3(9) | 10.2(2)   |
| C2   | 8387.2(12)  | 2037.3(15) | 5276.3(9) | 10.7(2)   |
| N6   | 6753.6(12)  | 6571.9(15) | 3136.7(9) | 13.4(2)   |
| N5   | 2134.2(13)  | 3473.3(14) | 3373.3(9) | 13.5(2)   |

**Table 12. Anisotropic Displacement Parameters ( $\text{\AA}^2 \times 10^3$ ) for 11. The Anisotropic displacement factor exponent takes the form:  $-2\pi^2[h^2a^*2U_{11}+2hka^*b^*U_{12}+\dots]$ .**

| Atom | $U_{11}$ | $U_{22}$ | $U_{33}$ | $U_{23}$ | $U_{13}$ | $U_{12}$ |
|------|----------|----------|----------|----------|----------|----------|
| O1   | 20.5(4)  | 14.6(4)  | 18.5(4)  | -5.4(3)  | 11.8(4)  | -1.0(3)  |
| O2   | 13.0(4)  | 30.2(5)  | 14.6(4)  | -6.6(4)  | 0.8(3)   | -2.4(4)  |
| O3   | 9.2(4)   | 27.6(5)  | 14.1(4)  | -0.8(4)  | 5.1(3)   | 0.9(3)   |
| O4   | 19.9(4)  | 13.7(4)  | 8.3(4)   | -3.4(3)  | 4.6(3)   | -2.3(3)  |
| O5   | 20.8(4)  | 15.4(4)  | 17.8(4)  | 6.3(3)   | 7.3(4)   | -3.1(3)  |
| O6   | 10.8(4)  | 27.2(5)  | 14.3(4)  | 5.5(4)   | 1.1(3)   | -0.2(3)  |
| O7   | 9.7(4)   | 32.5(5)  | 16.7(4)  | 5.3(4)   | 5.8(3)   | -1.1(4)  |
| O8   | 18.8(4)  | 14.5(4)  | 9.0(4)   | 3.4(3)   | 2.9(3)   | 0.1(3)   |
| N1   | 14.2(5)  | 11.6(5)  | 11.1(5)  | -1.4(4)  | 5.7(4)   | -2.7(4)  |
| N2   | 11.5(4)  | 10.2(4)  | 9.0(4)   | 0.7(4)   | 3.6(3)   | -0.4(3)  |
| N3   | 11.9(4)  | 11.8(5)  | 11.4(5)  | 1.4(4)   | 4.9(4)   | 1.9(4)   |
| N4   | 11.7(4)  | 11.0(4)  | 9.4(4)   | 0.3(4)   | 3.7(4)   | -0.3(4)  |
| C1   | 10.5(5)  | 11.3(5)  | 9.1(5)   | -0.9(4)  | 3.5(4)   | -1.0(4)  |
| C2   | 10.3(5)  | 12.4(5)  | 9.8(5)   | 1.8(4)   | 3.7(4)   | -0.4(4)  |
| N6   | 14.6(5)  | 13.7(5)  | 13.4(5)  | -0.5(4)  | 6.4(4)   | 1.1(4)   |
| N5   | 15.5(5)  | 13.6(5)  | 11.7(5)  | 0.2(4)   | 4.8(4)   | -2.2(4)  |

**Table 13. Bond Lengths for 11.**

| Atom | Atom | Length/ $\text{\AA}$ | Atom | Atom | Length/ $\text{\AA}$ |
|------|------|----------------------|------|------|----------------------|
| O1   | N1   | 1.2380(12)           | O8   | N4   | 1.2687(12)           |
| O2   | N1   | 1.2309(13)           | N1   | C1   | 1.4304(14)           |
| O3   | N2   | 1.2612(12)           | N2   | C1   | 1.3506(14)           |
| O4   | N2   | 1.2837(12)           | N3   | C2   | 1.4153(14)           |
| O5   | N3   | 1.2407(13)           | N4   | C2   | 1.3646(14)           |
| O6   | N3   | 1.2380(12)           | C1   | C2   | 1.4403(16)           |
| O7   | N4   | 1.2565(12)           |      |      |                      |

**Table 14. Bond Angles for 11.**

| Atom | Atom | Atom | Angle/ $^\circ$ | Atom | Atom | Atom | Angle/ $^\circ$ |
|------|------|------|-----------------|------|------|------|-----------------|
| O1   | N1   | C1   | 115.43(9)       | O7   | N4   | O8   | 119.51(9)       |
| O2   | N1   | O1   | 122.77(10)      | O7   | N4   | C2   | 123.47(9)       |
| O2   | N1   | C1   | 121.78(10)      | O8   | N4   | C2   | 116.93(9)       |
| O3   | N2   | O4   | 118.17(9)       | N1   | C1   | C2   | 119.47(10)      |
| O3   | N2   | C1   | 124.37(10)      | N2   | C1   | N1   | 120.01(10)      |
| O4   | N2   | C1   | 117.39(9)       | N2   | C1   | C2   | 120.16(10)      |
| O5   | N3   | C2   | 116.51(10)      | N3   | C2   | C1   | 119.23(10)      |
| O6   | N3   | O5   | 121.79(10)      | N4   | C2   | N3   | 120.21(10)      |
| O6   | N3   | C2   | 121.64(10)      | N4   | C2   | C1   | 120.29(10)      |

**Table 15. Hydrogen Bonds for 11.**

| D  | H   | A               | $d(\text{D-H})/\text{\AA}$ | $d(\text{H-A})/\text{\AA}$ | $d(\text{D-A})/\text{\AA}$ | $\text{D-H-A}/^\circ$ |
|----|-----|-----------------|----------------------------|----------------------------|----------------------------|-----------------------|
| N6 | H6A | O3 <sup>1</sup> | 0.897(18)                  | 2.035(19)                  | 2.9129(14)                 | 165.8(15)             |
| N6 | H6B | O8 <sup>2</sup> | 0.881(18)                  | 2.060(18)                  | 2.9261(14)                 | 167.4(15)             |
| N6 | H6C | O6 <sup>3</sup> | 0.90(2)                    | 2.270(19)                  | 2.9118(14)                 | 127.6(15)             |
| N6 | H6C | O7 <sup>3</sup> | 0.90(2)                    | 2.166(19)                  | 2.9496(14)                 | 144.6(16)             |
| N6 | H6D | O6 <sup>4</sup> | 0.853(19)                  | 2.254(19)                  | 3.0613(15)                 | 157.8(16)             |
| N5 | H5A | O4 <sup>1</sup> | 0.903(18)                  | 1.961(19)                  | 2.8491(14)                 | 167.3(15)             |
| N5 | H5B | O7 <sup>5</sup> | 0.915(17)                  | 2.016(18)                  | 2.8890(14)                 | 159.0(15)             |
| N5 | H5C | O4 <sup>4</sup> | 0.871(17)                  | 2.022(17)                  | 2.8634(14)                 | 161.9(15)             |
| N5 | H5D | O2              | 0.873(19)                  | 2.254(19)                  | 3.0072(15)                 | 144.4(15)             |
| N5 | H5D | O3              | 0.873(19)                  | 2.091(18)                  | 2.8337(14)                 | 142.5(15)             |

<sup>1</sup>1-X,1-Y,1-Z; <sup>2</sup>3/2-X,1/2+Y,1/2-Z; <sup>3</sup>2-X,1-Y,1-Z; <sup>4</sup>-1/2+X,1/2-Y,-1/2+Z; <sup>5</sup>-1+X,+Y,+Z

**Table 16. Torsion Angles for 11.**

| A  | B  | C  | D  | Angle/ $^\circ$ | A  | B  | C  | D  | Angle/ $^\circ$ |
|----|----|----|----|-----------------|----|----|----|----|-----------------|
| O1 | N1 | C1 | N2 | -163.40(10)     | O6 | N3 | C2 | N4 | 22.66(16)       |
| O1 | N1 | C1 | C2 | 9.74(15)        | O6 | N3 | C2 | C1 | -163.32(10)     |
| O2 | N1 | C1 | N2 | 18.15(16)       | O7 | N4 | C2 | N3 | 2.35(17)        |

|                         |                         |
|-------------------------|-------------------------|
| O2 N1 C1 C2 -168.70(10) | O7 N4 C2 C1 -171.61(10) |
| O3 N2 C1 N1 0.13(17)    | O8 N4 C2 N3 178.85(10)  |
| O3 N2 C1 C2 -172.97(10) | O8 N4 C2 C1 4.90(16)    |
| O4 N2 C1 N1 177.10(9)   | N1 C1 C2 N3 -114.93(12) |
| O4 N2 C1 C2 4.00(15)    | N1 C1 C2 N4 59.08(15)   |
| O5 N3 C2 N4 -160.14(10) | N2 C1 C2 N3 58.21(15)   |
| O5 N3 C2 C1 13.88(15)   | N2 C1 C2 N4 -127.78(12) |

**Table 17. Hydrogen Atom Coordinates ( $\text{\AA}\times 10^4$ ) and Isotropic Displacement Parameters ( $\text{\AA}^2\times 10^3$ ) for 11.**

| Atom | x        | y        | z        | U(eq) |
|------|----------|----------|----------|-------|
| H6A  | 6220(20) | 6880(20) | 3576(14) | 33(5) |
| H6B  | 6617(18) | 7270(20) | 2587(13) | 27(4) |
| H6C  | 7750(20) | 6620(20) | 3509(15) | 37(5) |
| H6D  | 6547(19) | 5550(30) | 2913(14) | 32(5) |
| H5A  | 2413(19) | 4590(20) | 3398(13) | 29(4) |
| H5B  | 1443(19) | 3340(20) | 3737(13) | 28(4) |
| H5C  | 1778(18) | 3110(20) | 2716(14) | 23(4) |
| H5D  | 2950(20) | 2880(20) | 3684(14) | 34(5) |

**Table 18. Crystal data and structure refinement for 12.**

|                                     |                                            |
|-------------------------------------|--------------------------------------------|
| CCDC #                              | 1847185                                    |
| Formula                             | $\text{C}_2\text{H}_9\text{N}_5\text{O}_7$ |
| $D_{\text{calc.}}/\text{g cm}^{-3}$ | 1.815                                      |
| $\mu/\text{mm}^{-1}$                | 0.180                                      |
| Formula Weight                      | 215.14                                     |
| Color                               | yellow                                     |
| Shape                               | needle                                     |
| Size/ $\text{mm}^3$                 | 0.40 $\times$ 0.13 $\times$ 0.08           |
| T/K                                 | 173(2)                                     |
| Crystal System                      | triclinic                                  |
| Space Group                         | P-1                                        |
| a/ $\text{\AA}$                     | 3.7131(15)                                 |
| b/ $\text{\AA}$                     | 9.097(4)                                   |
| c/ $\text{\AA}$                     | 12.626(5)                                  |
| $\alpha^\circ$                      | 108.745(7)                                 |
| $\beta^\circ$                       | 96.500(5)                                  |
| $\gamma^\circ$                      | 98.409(5)                                  |
| V/ $\text{\AA}^3$                   | 393.6(3)                                   |
| Z                                   | 2                                          |
| Z'                                  | 1                                          |
| Wavelength/ $\text{\AA}$            | 0.710730                                   |
| Radiation type                      | MoK $\alpha$                               |
| $\theta_{\text{min}}^\circ$         | 1.729                                      |
| $\theta_{\text{max}}^\circ$         | 25.327                                     |
| Measured Refl.                      | 6578                                       |
| Independent Refl.                   | 1451                                       |
| Reflections Used                    | 1169                                       |
| $R_{\text{int}}$                    | 0.0287                                     |
| Parameters                          | 163                                        |
| Restraints                          | 0                                          |
| Largest Peak                        | 0.301                                      |
| Deepest Hole                        | -0.233                                     |
| GooF                                | 1.118                                      |
| $wR_2$ (all data)                   | 0.1123                                     |
| $wR_2$                              | 0.1024                                     |
| $R_1$ (all data)                    | 0.0477                                     |
| $R_1$                               | 0.0383                                     |



**Table 19. Fractional Atomic Coordinates ( $\times 10^4$ ) and Equivalent Isotropic Displacement Parameters ( $\text{\AA}^2 \times 10^3$ ) for 12.  $U_{eq}$  is defined as 1/3 of the trace of the orthogonalised  $U_{ij}$ .**

| Atom | x       | y           | z          | $U_{eq}$ |
|------|---------|-------------|------------|----------|
| O1   | 7822(4) | 3247.0(17)  | -851.9(11) | 25.9(4)  |
| O2   | 9204(4) | 5483.6(15)  | 2488.6(11) | 28.3(4)  |
| O3   | 6778(4) | 4638.9(15)  | 3720(1)    | 27.5(4)  |
| O4   | 2051(4) | 2049.1(16)  | 2928.8(11) | 29.5(4)  |
| O5   | 2132(5) | 582.7(17)   | 1212.2(12) | 43.3(5)  |
| N1   | 7923(4) | 3821.9(18)  | 331.3(12)  | 21.8(4)  |
| N2   | 7146(4) | 4435.8(17)  | 2712.0(12) | 20.3(4)  |
| N3   | 3158(4) | 1860.9(18)  | 2008.7(13) | 23.0(4)  |
| C1   | 5985(5) | 2815(2)     | 651.9(16)  | 20.8(4)  |
| C2   | 5495(5) | 3079(2)     | 1813.3(15) | 19.3(4)  |
| O6   | 1264(4) | 8517.9(15)  | 5001.1(11) | 26.6(4)  |
| O7   | 4352(4) | 10843.5(16) | 6641.9(12) | 30.8(4)  |
| N4   | 3525(5) | 7371.5(19)  | 4827.6(15) | 22.9(4)  |
| N5   | 1838(5) | 11233(2)    | 7384.2(16) | 26.2(4)  |

**Table 20. Anisotropic Displacement Parameters ( $\times 10^4$ ) 12. The anisotropic displacement factor exponent takes the form:  $-2\pi^2[h^2a^{*2} \times U_{11} + \dots + 2hka^* \times b^* \times U_{12}]$**

| Atom | $U_{11}$ | $U_{22}$ | $U_{33}$ | $U_{23}$ | $U_{13}$ | $U_{12}$ |
|------|----------|----------|----------|----------|----------|----------|
| O1   | 32.7(8)  | 23.6(7)  | 15.6(7)  | 2.9(6)   | 5.6(6)   | -4.6(6)  |
| O2   | 36.5(8)  | 21.6(7)  | 22.2(7)  | 6.0(6)   | 5.1(6)   | -4.8(6)  |
| O3   | 39.1(8)  | 24.9(7)  | 15.4(7)  | 4.0(5)   | 6.7(6)   | 2.3(6)   |
| O4   | 33.9(8)  | 32.0(8)  | 24.4(8)  | 13.0(6)  | 8.7(6)   | 1.0(6)   |
| O5   | 63.5(11) | 25.8(8)  | 26.9(8)  | 0.9(6)   | 9.5(7)   | -16.7(7) |
| N1   | 24.0(8)  | 23.3(8)  | 15.5(8)  | 3.8(6)   | 3.8(6)   | 3.0(6)   |
| N2   | 22.5(8)  | 19.5(8)  | 18.8(8)  | 6.4(6)   | 2.8(6)   | 4.5(6)   |
| N3   | 24.1(8)  | 22.9(8)  | 22.3(9)  | 9.6(7)   | 2.6(7)   | 2.8(6)   |
| C1   | 21.4(9)  | 18.2(9)  | 20.8(10) | 5.0(8)   | 1.7(8)   | 2.6(7)   |
| C2   | 20.6(9)  | 18.3(9)  | 19.1(9)  | 7.5(7)   | 2.2(7)   | 2.6(7)   |
| O6   | 23.1(7)  | 24.9(7)  | 27.9(8)  | 3.6(6)   | 3.1(6)   | 6.0(6)   |
| O7   | 23.3(7)  | 34.9(8)  | 24.6(8)  | -1.5(6)  | 2.4(6)   | 3.5(6)   |
| N4   | 25.2(9)  | 21.2(8)  | 21.4(9)  | 7.7(7)   | 1.8(7)   | 2.7(7)   |
| N5   | 23.2(9)  | 22.6(9)  | 30.7(10) | 7.3(8)   | 4.8(8)   | 2.6(7)   |

**Table 21. Bond Lengths in  $\text{\AA}$  for 12.**

| Atom | Atom | Length/ $\text{\AA}$ | Atom | Atom | Length/ $\text{\AA}$ |
|------|------|----------------------|------|------|----------------------|
| O1   | N1   | 1.409(2)             | N2   | C2   | 1.381(2)             |
| O2   | N2   | 1.2571(19)           | N3   | C2   | 1.409(2)             |
| O3   | N2   | 1.252(2)             | C1   | C2   | 1.445(3)             |
| O4   | N3   | 1.244(2)             | O6   | N4   | 1.411(2)             |
| O5   | N3   | 1.241(2)             | O7   | N5   | 1.399(2)             |
| N1   | C1   | 1.277(2)             |      |      |                      |

**Table 22. Bond Angles in  $^\circ$  for 12.**

| Atom | Atom | Atom | Angle/ $^\circ$ | Atom | Atom | Atom | Angle/ $^\circ$ |
|------|------|------|-----------------|------|------|------|-----------------|
| C1   | N1   | O1   | 111.18(15)      | O5   | N3   | C2   | 117.50(15)      |
| O2   | N2   | C2   | 116.95(15)      | N1   | C1   | C2   | 124.06(17)      |
| O3   | N2   | O2   | 119.55(14)      | N2   | C2   | N3   | 119.67(15)      |
| O3   | N2   | C2   | 123.46(15)      | N2   | C2   | C1   | 123.88(16)      |
| O4   | N3   | C2   | 122.20(15)      | N3   | C2   | C1   | 116.45(15)      |
| O5   | N3   | O4   | 120.27(15)      |      |      |      |                 |

**Table 23. Torsion Angles in ° for 12.**

| Atom | Atom | Atom | Atom | Angle/°     |
|------|------|------|------|-------------|
| O1   | N1   | C1   | C2   | -178.76(15) |
| O2   | N2   | C2   | N3   | 180.00(14)  |
| O2   | N2   | C2   | C1   | -0.5(2)     |
| O3   | N2   | C2   | N3   | 2.3(3)      |
| O3   | N2   | C2   | C1   | -178.21(16) |
| O4   | N3   | C2   | N2   | 11.4(2)     |
| O4   | N3   | C2   | C1   | -168.17(16) |
| O5   | N3   | C2   | N2   | -170.51(17) |
| O5   | N3   | C2   | C1   | 9.9(2)      |
| N1   | C1   | C2   | N2   | -1.7(3)     |
| N1   | C1   | C2   | N3   | 177.86(16)  |

**Table 24. Hydrogen Fractional Atomic Coordinates ( $\times 10^4$ ) and Equivalent Isotropic Displacement Parameters ( $\text{\AA}^2 \times 10^3$ ) for 12.  $U_{eq}$  is defined as 1/3 of the trace of the orthogonalised  $U_{ij}$ .**

| Atom | x        | y         | z        | $U_{eq}$ |
|------|----------|-----------|----------|----------|
| H1   | 9060(70) | 3950(30)  | -950(20) | 39(7)    |
| H1A  | 4740(60) | 1800(30)  | 116(18)  | 28(5)    |
| H4A  | 5950(80) | 7760(30)  | 4750(20) | 46(7)    |
| H4B  | 2500(80) | 6520(40)  | 4160(30) | 68(9)    |
| H4C  | 3650(70) | 6990(30)  | 5390(20) | 44(7)    |
| H5A  | 3020(80) | 12160(30) | 8000(20) | 53(7)    |
| H5B  | -160(90) | 11380(30) | 7050(20) | 63(9)    |
| H5C  | 1120(70) | 10500(30) | 7610(20) | 45(8)    |
| H6   | 2770(90) | 9650(40)  | 5830(30) | 85(10)   |

**Table 25. Hydrogen Bond information for 12.**

| D  | H   | A               | d(D-H)/Å | d(H-A)/Å | d(D-A)/Å   | D-H-A/deg |
|----|-----|-----------------|----------|----------|------------|-----------|
| O1 | H1  | N1 <sup>1</sup> | 0.78(3)  | 2.02(3)  | 2.728(2)   | 149(2)    |
| N4 | H4A | O6 <sup>2</sup> | 0.95(3)  | 1.95(3)  | 2.868(2)   | 164(2)    |
| N5 | H5A | O1 <sup>3</sup> | 0.95(3)  | 2.06(3)  | 2.884(2)   | 145(2)    |
| N5 | H5B | O7 <sup>4</sup> | 0.86(3)  | 1.99(3)  | 2.764(3)   | 149(3)    |
| O6 | H6  | O7              | 1.22(3)  | 1.24(3)  | 2.4531(19) | 177(3)    |

-----  
<sup>1</sup>2-X,1-Y,-Z; <sup>2</sup>1+X,+Y,+Z; <sup>3</sup>+X,1+Y,1+Z; <sup>4</sup>-1+X,+Y,+Z

**Table 26. Crystal data and structure refinement for 14.**

|                              |                                                               |
|------------------------------|---------------------------------------------------------------|
| Formula                      | C <sub>4</sub> H <sub>15</sub> N <sub>9</sub> O <sub>12</sub> |
| CCDC #                       | 1847184                                                       |
| $D_{calc.}/g\text{ cm}^{-3}$ | 1.784                                                         |
| $\rho/\text{mm}^{-1}$        | 0.175                                                         |
| Formula Weight               | 381.25                                                        |
| Color                        | yellow                                                        |
| Shape                        | chunk                                                         |
| Size/mm <sup>3</sup>         | 0.30×0.25×0.19                                                |
| $T/\text{K}$                 | 173(2)                                                        |
| Crystal System               | triclinic                                                     |
| Space Group                  | <i>P</i> -1                                                   |
| $a/\text{Å}$                 | 8.1131(10)                                                    |
| $b/\text{Å}$                 | 8.6292(10)                                                    |
| $c/\text{Å}$                 | 11.1334(13)                                                   |
| $\alpha^\circ$               | 106.9700(10)                                                  |
| $\beta^\circ$                | 93.5300(10)                                                   |
| $\gamma^\circ$               | 105.5540(10)                                                  |
| $V/\text{Å}^3$               | 709.89(15)                                                    |
| $Z$                          | 2                                                             |
| $Z'$                         | 1                                                             |
| Wavelength/Å                 | 0.710730                                                      |
| Radiation type               | MoK $\alpha$                                                  |
| $\theta_{min}^\circ$         | 1.935                                                         |
| $\theta_{max}^\circ$         | 25.388                                                        |
| Measured Refl.               | 5829                                                          |
| Independent Refl.            | 2596                                                          |
| Reflections Used             | 2144                                                          |
| $R_{int}$                    | 0.0201                                                        |
| Parameters                   | 286                                                           |
| Restraints                   | 0                                                             |
| Largest Peak                 | 0.414                                                         |
| Deepest Hole                 | -0.292                                                        |
| GooF                         | 1.078                                                         |
| $wR_2$ (all data)            | 0.1369                                                        |
| $wR_2$                       | 0.1253                                                        |
| $R_1$ (all data)             | 0.0532                                                        |
| $R_1$                        | 0.0453                                                        |

**Table 27. Fractional Atomic Coordinates ( $\times 10^4$ ) and Equivalent Isotropic Displacement Parameters ( $\text{\AA}^2 \times 10^3$ ) for 14.  $U_{eq}$  is defined as 1/3 of the trace of the orthogonalised  $U_{ij}$ .**

| Atom | x           | y           | z           | $U_{eq}$ |
|------|-------------|-------------|-------------|----------|
| O1   | 8675.5(19)  | 6915.3(18)  | 6423.5(14)  | 24.4(4)  |
| O2   | 7859.5(18)  | 10652.2(18) | 5181.9(13)  | 25.2(4)  |
| O3   | 9261.3(19)  | 13326.4(17) | 5963.6(14)  | 26.8(4)  |
| O4   | 11483.5(18) | 14225.3(17) | 7930.2(13)  | 24.0(4)  |
| O5   | 12082(2)    | 12245.3(19) | 8516.0(15)  | 34.3(4)  |
| N1   | 8561(2)     | 8361(2)     | 6101.8(16)  | 20.6(4)  |
| N2   | 9012(2)     | 11835(2)    | 5976.2(15)  | 19.7(4)  |
| N3   | 11228(2)    | 12688(2)    | 7788.0(16)  | 20.6(4)  |
| C1   | 9680(3)     | 9687(3)     | 6859.5(19)  | 19.7(4)  |
| C2   | 9968(2)     | 11407(2)    | 6840.5(18)  | 18.8(4)  |
| O6   | 4668.4(19)  | 6331.1(19)  | 9321.6(14)  | 25.4(4)  |
| O7   | 4849(2)     | 9351.3(19)  | 7134.9(14)  | 31.5(4)  |
| O8   | 6486.5(18)  | 11930.8(17) | 7605.6(13)  | 24.7(4)  |
| O9   | 8845.2(18)  | 12982.8(18) | 9535.3(14)  | 25.5(4)  |
| O10  | 8694(2)     | 11428(2)    | 10743.9(16) | 44.9(5)  |
| N4   | 4837(2)     | 7545(2)     | 8674.3(16)  | 21.8(4)  |
| N5   | 6016(2)     | 10575(2)    | 7858.6(16)  | 20.0(4)  |
| N6   | 8147(2)     | 11646(2)    | 9754.7(16)  | 22.9(4)  |
| C3   | 6140(3)     | 8831(3)     | 9270.0(19)  | 21.9(5)  |
| C4   | 6758(2)     | 10351(2)    | 8931.8(18)  | 18.5(4)  |
| O11  | 5292(2)     | 6058.4(19)  | 3354.6(13)  | 27.4(4)  |
| N7   | 5285(2)     | 7466(2)     | 4404.3(16)  | 20.7(4)  |
| O12  | 3200.1(17)  | 5549.8(16)  | 5571.6(12)  | 21.0(3)  |
| N8   | 2184(2)     | 6340(2)     | 6386.1(17)  | 20.5(4)  |
| N9   | 7885(3)     | 5515(2)     | 8641.2(19)  | 25.7(4)  |

**Table 28. Anisotropic Displacement Parameters ( $\times 10^4$ ) 14. The anisotropic displacement factor exponent takes the form:  $-2\pi^2[h^2a^{*2} \times U_{11} + \dots + 2hka^* \times b^* \times U_{12}]$ .**

| Atom | $U_{11}$ | $U_{22}$ | $U_{33}$ | $U_{23}$ | $U_{13}$ | $U_{12}$ |
|------|----------|----------|----------|----------|----------|----------|
| O1   | 30.4(8)  | 15.8(7)  | 25.5(8)  | 7.7(6)   | -3.3(6)  | 5.0(6)   |
| O2   | 25.3(8)  | 21.2(8)  | 23.3(8)  | 6.1(6)   | -7.5(6)  | 1.3(6)   |
| O3   | 29.5(8)  | 18.3(8)  | 31.9(9)  | 12.2(6)  | -5.1(6)  | 3.2(6)   |
| O4   | 27.6(8)  | 15.6(7)  | 24.6(8)  | 6.3(6)   | -1.1(6)  | 1.0(6)   |
| O5   | 37.9(9)  | 23.3(8)  | 35.3(9)  | 10.7(7)  | -18.1(7) | 2.6(7)   |
| N1   | 23.3(9)  | 18.8(9)  | 21.3(9)  | 8.5(7)   | 1.6(7)   | 7.2(7)   |
| N2   | 18.7(8)  | 19.9(9)  | 19.8(9)  | 7.4(7)   | 0.3(7)   | 4.1(7)   |
| N3   | 21.1(9)  | 20.2(9)  | 20.0(9)  | 7.9(7)   | 0.0(7)   | 4.3(7)   |
| C1   | 19.9(10) | 21.3(11) | 18.9(10) | 7.0(8)   | -0.4(8)  | 7.9(8)   |
| C2   | 19.1(10) | 18.6(10) | 18.6(10) | 6.5(8)   | 0.6(8)   | 5.5(8)   |
| O6   | 25.7(8)  | 20.8(8)  | 28.5(8)  | 13.5(7)  | -3.0(7)  | 0.2(6)   |
| O7   | 33.6(9)  | 23.8(8)  | 25.8(8)  | 8.7(7)   | -18.5(7) | -6.6(7)  |
| O8   | 29.9(8)  | 19.0(8)  | 25.6(8)  | 11.7(6)  | -1.1(6)  | 4.2(6)   |
| O9   | 25.3(8)  | 20.1(8)  | 27.8(8)  | 11.2(6)  | -1.5(6)  | -1.3(6)  |
| O10  | 47.7(11) | 37.6(10) | 37.6(10) | 23.0(8)  | -23.8(8) | -11.8(8) |
| N4   | 24.1(9)  | 17.9(9)  | 25.1(9)  | 10.1(7)  | 2.3(7)   | 5.6(7)   |
| N5   | 20.7(9)  | 19.8(9)  | 18.8(9)  | 6.1(7)   | 1.4(7)   | 5.3(7)   |
| N6   | 22.8(9)  | 22.9(9)  | 21.9(9)  | 8.8(7)   | -1.5(7)  | 4.1(7)   |
| C3   | 23.7(11) | 23.2(11) | 20.0(11) | 7.3(9)   | -0.1(8)  | 8.9(9)   |
| C4   | 20.4(10) | 18.2(10) | 14.5(10) | 4.4(8)   | -1.3(8)  | 3.6(8)   |
| O11  | 36.1(9)  | 28.9(8)  | 18.9(8)  | 4.5(6)   | -0.6(6)  | 17.1(7)  |
| N7   | 21.6(9)  | 18.8(9)  | 19.4(9)  | 4.4(7)   | -1.1(7)  | 5.2(7)   |
| O12  | 23.1(7)  | 18.6(7)  | 21.4(8)  | 5.2(6)   | 3.1(6)   | 7.8(6)   |
| N8   | 19.1(9)  | 20.0(9)  | 23.0(10) | 8.3(8)   | 1.8(8)   | 5.6(7)   |
| N9   | 27.2(10) | 19.7(10) | 27.0(10) | 6.6(8)   | -3.6(8)  | 4.4(8)   |

**Table 29. Bond Lengths in  $\text{\AA}$  for 14.**

| Atom | Atom | Length/ $\text{\AA}$ | Atom | Atom | Length/ $\text{\AA}$ |
|------|------|----------------------|------|------|----------------------|
| O1   | N1   | 1.418(2)             | O5   | N3   | 1.240(2)             |
| O2   | N2   | 1.248(2)             | N1   | C1   | 1.277(3)             |
| O3   | N2   | 1.252(2)             | N2   | C2   | 1.391(3)             |
| O4   | N3   | 1.247(2)             | N3   | C2   | 1.400(3)             |

| Atom | Atom | Length/Å |
|------|------|----------|
| C1   | C2   | 1.446(3) |
| O6   | N4   | 1.418(2) |
| O7   | N5   | 1.238(2) |
| O8   | N5   | 1.249(2) |
| O9   | N6   | 1.242(2) |
| O10  | N6   | 1.245(2) |

| Atom | Atom | Length/Å |
|------|------|----------|
| N4   | C3   | 1.282(3) |
| N5   | C4   | 1.391(3) |
| N6   | C4   | 1.399(3) |
| C3   | C4   | 1.439(3) |
| O11  | N7   | 1.420(2) |
| O12  | N8   | 1.414(2) |

**Table 30. Bond Angles in ° for 14.**

| Atom | Atom | Atom | Angle/°    |
|------|------|------|------------|
| C1   | N1   | O1   | 109.44(16) |
| O2   | N2   | O3   | 119.69(16) |
| O2   | N2   | C2   | 117.10(16) |
| O3   | N2   | C2   | 123.22(17) |
| O4   | N3   | C2   | 122.49(16) |
| O5   | N3   | O4   | 120.03(16) |
| O5   | N3   | C2   | 117.47(16) |
| N1   | C1   | C2   | 126.19(19) |
| N2   | C2   | N3   | 119.66(17) |
| N2   | C2   | C1   | 123.33(18) |
| N3   | C2   | C1   | 116.94(17) |
| C3   | N4   | O6   | 108.05(16) |
| O7   | N5   | O8   | 120.02(16) |
| O7   | N5   | C4   | 117.12(16) |
| O8   | N5   | C4   | 122.86(16) |
| O9   | N6   | O10  | 119.38(17) |
| O9   | N6   | C4   | 122.80(16) |
| O10  | N6   | C4   | 117.83(17) |
| N4   | C3   | C4   | 126.07(18) |
| N5   | C4   | N6   | 120.25(17) |
| N5   | C4   | C3   | 122.93(17) |
| N6   | C4   | C3   | 116.81(17) |

**Table 31. Hydrogen Fractional Atomic Coordinates ( $\times 10^4$ ) and Equivalent Isotropic Displacement Parameters ( $\text{\AA}^2 \times 10^3$ ) for 14.  $U_{eq}$  is defined as 1/3 of the trace of the orthogonalised  $U_{ij}$ .**

| Atom | x         | y        | z         | $U_{eq}$ |
|------|-----------|----------|-----------|----------|
| H1   | 8020(30)  | 6050(30) | 5770(30)  | 42(7)    |
| H1A  | 10370(30) | 9620(30) | 7470(20)  | 27(6)    |
| H6   | 3740(30)  | 5470(30) | 8850(20)  | 32(7)    |
| H3   | 6830(30)  | 8840(30) | 10000(20) | 27(6)    |
| H11  | 5790(40)  | 5510(30) | 3780(20)  | 41(7)    |
| H7A  | 6450(40)  | 8080(30) | 4900(20)  | 43(7)    |
| H7B  | 4830(30)  | 8130(30) | 3980(20)  | 32(6)    |
| H7C  | 4500(30)  | 7000(30) | 4940(20)  | 40(7)    |
| H8A  | 1560(30)  | 6820(30) | 5940(20)  | 27(6)    |
| H8B  | 1350(30)  | 5510(30) | 6600(20)  | 35(7)    |
| H8C  | 2940(30)  | 7100(30) | 7080(20)  | 30(6)    |
| H9A  | 7800(40)  | 4340(40) | 8450(30)  | 55(9)    |
| H9B  | 7030(50)  | 5740(40) | 9020(30)  | 84(12)   |
| H9C  | 8930(50)  | 6140(50) | 9200(30)  | 79(11)   |
| H9D  | 7910(40)  | 5860(40) | 7900(30)  | 60(9)    |

**Table 32. Hydrogen Bond information for 14.**

| D   | H   | A                | d(D-H)/\AA | d(H-A)/\AA | d(D-A)/\AA | D-H-A/deg |
|-----|-----|------------------|------------|------------|------------|-----------|
| O1  | H1  | O12 <sup>1</sup> | 0.89(3)    | 1.73(3)    | 2.620(2)   | 176(3)    |
| O6  | H6  | O4 <sup>2</sup>  | 0.91(3)    | 1.90(3)    | 2.779(2)   | 162(2)    |
| O11 | H11 | O12 <sup>1</sup> | 0.90(3)    | 1.66(3)    | 2.5595(19) | 175(3)    |
| N7  | H7A | O2               | 0.99(3)    | 2.12(3)    | 2.825(2)   | 127(2)    |
| N7  | H7B | O8 <sup>3</sup>  | 0.97(3)    | 1.98(3)    | 2.834(2)   | 145(2)    |
| N7  | H7C | O12              | 0.99(3)    | 1.75(3)    | 2.703(2)   | 161(2)    |
| N8  | H8B | O4 <sup>2</sup>  | 0.94(3)    | 2.11(3)    | 2.829(2)   | 132(2)    |
| N8  | H8C | O7               | 0.91(3)    | 2.12(2)    | 2.761(2)   | 126.5(19) |
| N9  | H9A | O8 <sup>4</sup>  | 0.96(3)    | 1.97(3)    | 2.838(2)   | 149(3)    |

<sup>1</sup>1-x,1-y,1-z; <sup>2</sup>-1+x,-1+y,+z; <sup>3</sup>1-x,2-y,1-z; <sup>4</sup>+x,-1+y,+z
